# Supplementary material
Source: MDPI journal article supplement (https://www.mdpi.com/1999-4907/9/10/625)
Supplement: s1 [file s1]

## Supplementary Material: Estimation of Forest Carbon Stocks for National Greenhouse Gas Inventory Reporting in South Korea

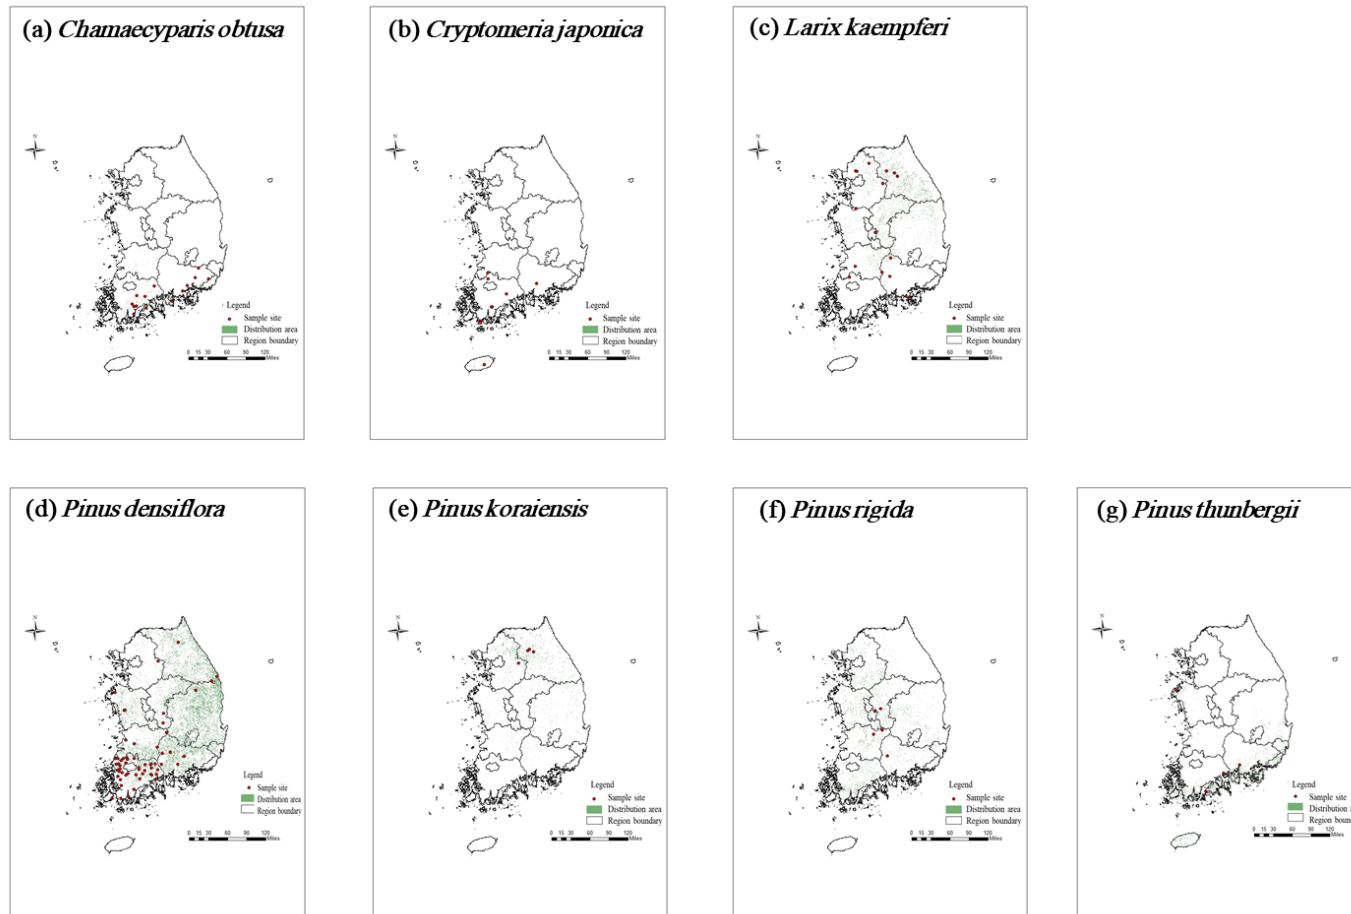

**Figure S1.** Location of studied sites for emission factor in biomass, soil, and litter by coniferous species.

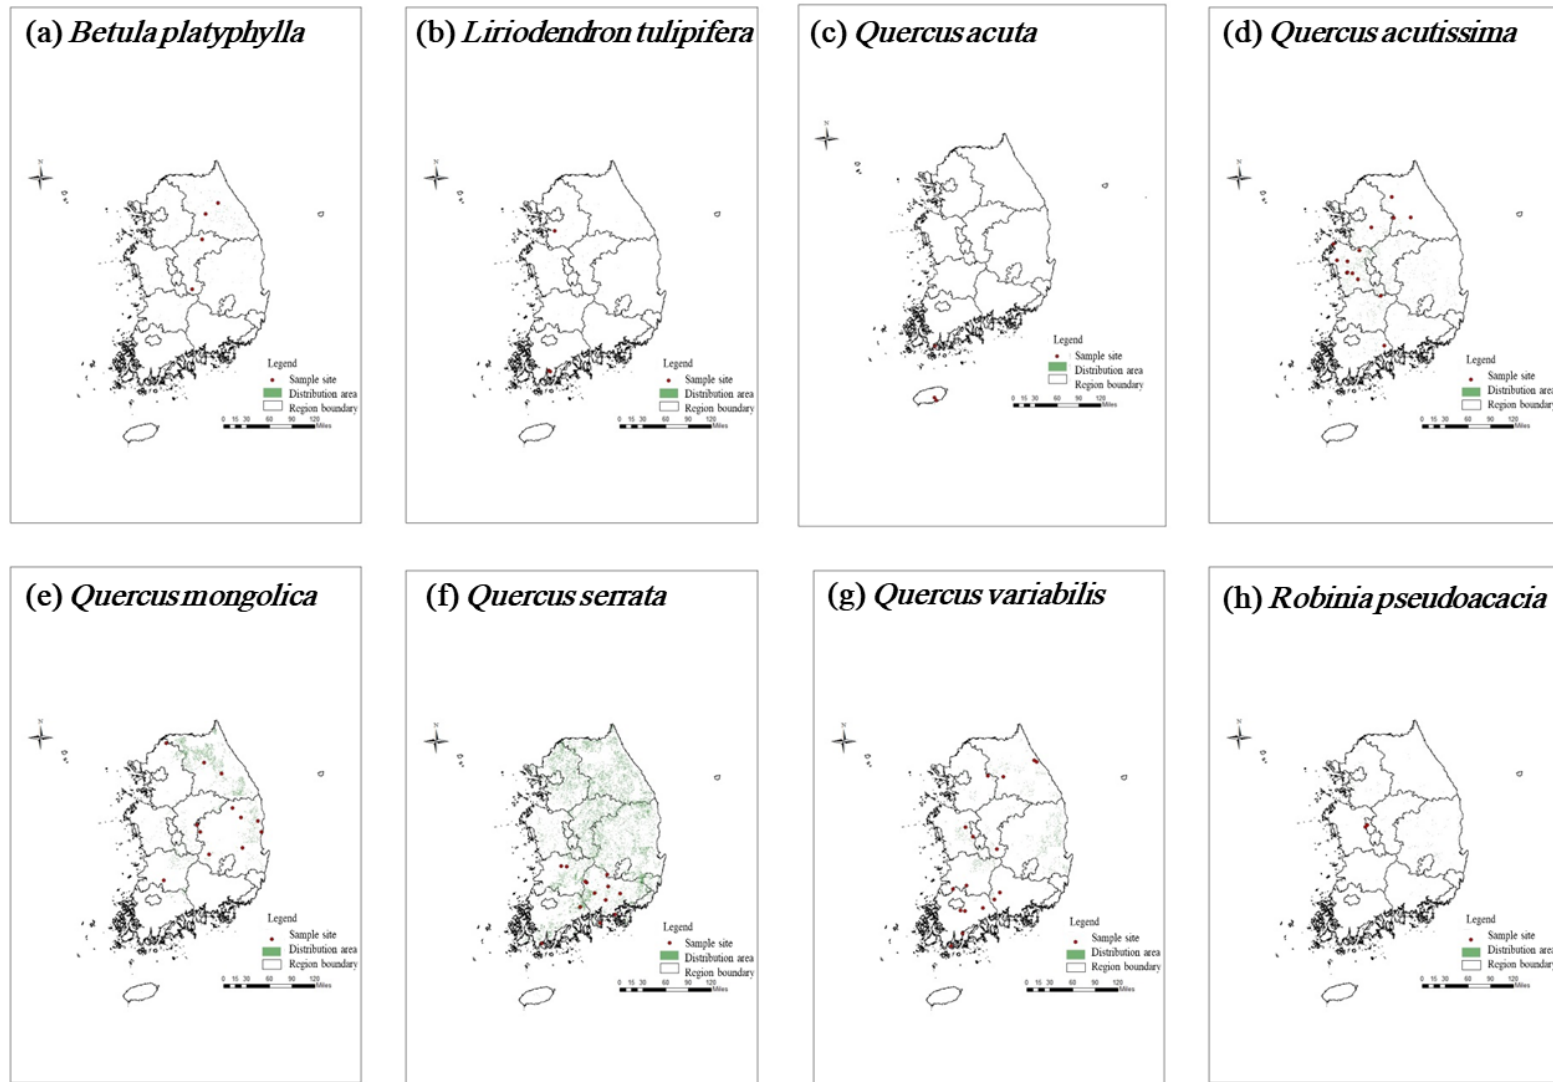

**Figure S2.** Location of studied sites for emission factor in biomass, soil, and litter by deciduous species.
